# Supplementary material
Source: publisher figshare collection journal article supplement (https://gsapubs.figshare.com/ndownloader/files/22744214)
Supplement: Supplementary file 1 [file 22744214]

TABLE DR 1. LOCATION AND PETROGRAPHIC CHARACTERISTICS OF SIERRA NACIMIENTO PIEDMONT DEPOSITS

| Section  | Location<br>(UTM)     | % granitic | % sedimentary | % matrix | % quartz | % feldspar | % lithics |
|----------|-----------------------|------------|---------------|----------|----------|------------|-----------|
| strat 1  | 3994197 N<br>327450 E | 58.33      | 0.00          | 41.67    | 40.00    | 3.50       | 56.50     |
| strat 2  | 3962740 N<br>323562 E | 38.38      | 28.28         | 33.33    | 54.50    | 14.00      | 31.50     |
| strat 3  | 3994109 N<br>326918 E | 77.78      | 8.33          | 13.89    | N.D.     | N.D.       | N.D.      |
| strat 4  | 3987164 N<br>327660 E | 43.06      | 20.83         | 36.11    | N.D.     | N.D.       | N.D.      |
| strat 5  | 3985910 N<br>328111 E | 38.89      | 4.17          | 56.94    | N.D.     | N.D.       | N.D.      |
| strat 6  | 4004218 N<br>323348 E | 54.00      | 0.00          | 46.00    | N.D.     | N.D.       | N.D.      |
| strat 7  | 4005554 N<br>324242 E | 76.39      | 0.00          | 23.61    | 51.50    | 14.50      | 34.00     |
| strat 8  | 3979023 N<br>329059 E | 48.61      | 2.78          | 48.61    | 52.50    | 12.00      | 35.50     |
| strat 9  | 4012089 N<br>322283 E | 34.72      | 34.72         | 30.56    | N.D.     | N.D.       | N.D.      |
| strat 10 | 3993577 N<br>321906 E | 62.50      | 0.00          | 37.50    | N.D.     | N.D.       | N.D.      |
| strat 11 | 3976915 N<br>321257 E | 30.56      | 18.06         | 51.39    | N.D.     | N.D.       | N.D.      |
| strat 12 | 3985204 N<br>320709 E | 79.17      | 2.78          | 18.06    | N.D.     | N.D.       | N.D.      |
| strat 13 | 3957306 N<br>328050 E | 91.67      | 5.56          | 2.78     | N.D.     | N.D.       | N.D.      |
| strat 14 | 3947776 N<br>329094 E | 87.50      | 8.33          | 4.17     | 56.50    | 13.50      | 30.00     |

TABLE DR 2. IMPORTANT SEDIMENTOLOGIC CHARACTERISTICS OF SIERRA NACIMIENTO PIEDMONT QUATERNARY DEPOSITS.

| Deposit  | Sedimentology                                                                                                                                                                        | Location and depositional environment                                                                                                                   |
|----------|--------------------------------------------------------------------------------------------------------------------------------------------------------------------------------------|---------------------------------------------------------------------------------------------------------------------------------------------------------|
| facies 1 | 1-5 m thick, subangular to subround gravel, cobble, and boulder size clasts in silt to coarse grain sand matrix fining upwards to beds of silt, sand, and mud                        | braided perennial stream fluvial facies; found in Veguita Blanca, Leche, and Laguna Bonita formations                                                   |
| facies 2 | 0.5-1 m thick, subangular to subround gravel, cobble, and boulder size clasts in silt to coarse grain sand matrix, lacks stratification, rare fining upwards cycles                  | ephemeral stream deposits related to alluvial fan drainage; found in Leche formation                                                                    |
| facies 3 | 1+ m thick, subangular to subround, small cobble and pebble clasts in a medium grain sand to silt matrix repetitively fining upwards to fine sand and silt in 10+ cm thick sequences | overbank deposits on bars in a braided channel system; found in Veguita Blanca formation                                                                |
| facies 4 | 0.5-1.5+ m thick, subangular to subround, fine to medium grain cross-bedded sand with occasional beds of coarser pebble and small cobble size clasts                                 | perennial braided and meandering sandy bed channels; found in Leche and Laguna Bonita formation                                                         |
| facies 5 | 0.5+ m thick, well-developed, fine grained silt and sand soils with local disseminated carbonate material                                                                            | cienega deposits associated with ever-wet marshes, oxbow lakes, springs, and flood plains; found in Veguita Blanca, Leche, and Laguna Bonita formations |

Frankel and Pazzaglia, 2004, Table DR 2

TABLE DR 3. IMPORTANT SEDIMENTOLOGIC CHARACTERISTICS AND AGE OF TAOS PIEDMONT QUATERNARY DEPOSITS

| Deposit        | Sedimentology                                                                                                                                                                                                                                                     | Location and depositional environment                                                                                                                                                         | Age                                                                    |
|----------------|-------------------------------------------------------------------------------------------------------------------------------------------------------------------------------------------------------------------------------------------------------------------|-----------------------------------------------------------------------------------------------------------------------------------------------------------------------------------------------|------------------------------------------------------------------------|
| Qf3            | 1-10 m thick, dark-colored, silt-rich matrix- supported debris-flow deposits; proximal levees and distal run-out deposits; interfingers in distal fan with eolian deposits                                                                                        | inset into fan heads; buries distal older fans; Debris flows                                                                                                                                  | 3600±130 years<br>3500±240 years                                       |
| Qf2            | 1-10+ m thick, brownish-red to yellowish-brown, moderately well sorted, moderately stratified, subangular gravelly sand, sandy gravel, and gravelly sandy silt overlain by 0.1 – 0.5 m reddish brown loess. Stage I calcic horizon development                    | Equant fan lobes, extending to the middle piedmont; inset in Qf1; mixed "wet-climate" fluvial-debris flow alluvial fans.                                                                      | Late Pleistocene<br>Pinedale (?)                                       |
| Qf1            | 1-10+ m thick, brownish-red to yellowish-brown moderately well sorted, moderately stratified, subangular gravelly sand, sandy gravel, and gravelly sandy silt overlain by 0.5 – 1.5 m reddish- brown and brownish-red loess. Stage II+ calcic horizon development | Elongate fan lobes, extending to the distal piedmont; conformably overlies the Lama formation; Mixed "wet-climate" fluvial-debris flow alluvial fans.                                         | Late Middle Pleistocene<br>Bull Lake (?) > 47 ka                       |
| Lama formation | 50-300 + m thick, yellow, moderately well sorted, subangular sandy gravel interbedded with silty sand and sandy silt                                                                                                                                              | Piedmont and Rio Grande rift (San Luis) basin center; contains piedmont fluvial and alluvial fan facies that interfinger with Rio Grande axial stream deposits as well as Servilleta basalts. | 1.2 Ma top (Upper Bandelier tephra) to 4.3 Ma base (Servilleta basalt) |

Frankel and Pazzaglia, 2004, Table DR 3
